# Supplementary material for: Effect and safety of C7 neurotomy at the intervertebral foramen in patients with chronic poststroke aphasia: a multicentre, randomised, controlled study protocol
Source: PubMed Central journal article supplement — BMJ Open. 2023 May 2;13(5):e065173. doi: 10.1136/bmjopen-2022-065173 (PMC10163524; doi:10.1136/bmjopen-2022-065173), 2023-05-02
Supplement: bmjopen-2022-065173supp001.pdf [file bmjopen-2022-065173supp001.pdf]

**Supplemental Table 1. List of all participating institutions and institutional review boards in this trial**

| <b>Major research institution</b>               | <b>Name of institutional review board</b>                                     |
|-------------------------------------------------|-------------------------------------------------------------------------------|
| Huashan Hospital, Fudan University              | Institutional Review Board of Huashan Hospital Affiliated to Fudan University |
| <b>Sub-centre research institution</b>          | <b>Name of institutional review board</b>                                     |
| Shanghai Pudong Hospital                        | Academic Ethics Committee of Shanghai Pudong Hospital                         |
| Huadong Hospital Affiliated to Fudan University | Ethics Committee of Huadong Hospital Affiliated to Fudan University           |
| Shanghai Xuhui Central Hospital                 | Shanghai Xuhui Central Hospital Ethics Committee                              |
